# Supplementary material for: Incorporation of histone H3.1 suppresses the lineage potential of skeletal muscle
Source: PubMed Central journal article supplement (PMC4333396; doi:10.1093/nar/gku1346), 2014-12-24
Supplement: supp_gku1346_nar-03342-x-2014-File011.pdf [file supp_gku1346_nar-03342-x-2014-File011.pdf]

## Table S2. ChIP primer list

Acta1 -81 -110: 5'-TGTTGCTGCCCTTCCCAAGCCATATTTGGG-3'

Acta1 -236 -265: 5'-GCAGACAGCTGGGGATACTCTCCATATACG-3'

Ckm -221 -192: 5'-TAGTTTAGGAACCAGTGAGCAAGTCAGCCC-3'

Ckm -114 -85: 5'-CCTGAGAGTAGATGAGCTTTCAGCTCGTTG-3'

Eef1a1 -186 -213: 5'-CGGGTACCGGGATTATGGGTTATGAGAA-3'

Eef1a1 -317 -343: 5'-TAGGGATAGATTCTGGCCGCCCTCTTG-3'

Neurod6 -19 +12: 5'-TTTTTCCCTATCAGTCTAACCTCCTGTGTTGA-3'

Neurod6 -174 -145: 5'-AAAAGTGACATTGATGCCAACTGCCAGAGC-3'

Tbx15 -773 -744: 5'-CCAGATCTGCATCTGAACTGAGTATGATAG-3'

Tbx15 -680 -651: 5'-GTCAAATCTGATCTTCGCCCTTATAGACT-3'

Hspb2 -277 -250: 5'-AGTTGTACATTCCACATCACCTTTGTC-3'

Hspb2 -401 -372: 5'-CAGAAGACACTGACCTTACAAAGACAGAAA-3'

Anapc5 -206 -179: 5'-GATTTTGATCAGAGACAGCGTGAACCTAC-3'

Anapc5 -320 -291: 5'-TATACACATATACAGGCGAGGTGTCTTGTT-3'

Hdgf -593 -564: 5'-CCTTAGAATATAACCCAGGCCAAATACAGT-3'

Hdgf -490 -461: 5'-GGACTATCACCAATTACCCTCACTAGAATA-3'

Calb1 -807 -778: 5'-CGGATATTTTTCCACCTCTAATGATTTCC-3'

Calb1 -692 -663: 5'-GTAGAACTGAAAGAAATGTCACCAGGCTA-3'

Lhx5 -283 -255: 5'-ATTTGTGATGGGAGAGAAAAAGAACCCTG-3'

Lhx5 -180 -151: 5'-CAAGACATCAGTATTGCCGAGTATTTGCTA-3'
